# Supplementary material
Source: publisher figshare collection journal article supplement (https://frontiersin.figshare.com/ndownloader/files/17935862)
Supplement: Supplementary file 1 [file 17935862]

## Sheet: Sheet1
Table S1. Bulk soil chemistry
										--------Total------------
Sample		%	------------------------------------ppm-----------------------------------------							N	C	C:N
	pH	OM	NO3-N	P	K	Zn	Fe	Mn	Cu	-----------%------------		Ratio
Hilaria Apr-May 2014	7.93	2.1	0.81	8.1	148.8	0.64	2.3	3.1	1.44	0.0479	2.268	47.3486
Bromus Apr-May 2014	7.93	2.3	0.48	6.3	128.3	0.64	2.5	3.4	1.1	0.0404	1.695	41.9554
Below Lichen Apr-May 2014	8.22	1.6	0.79	7.2	166.8	0.43	2.2	2	0.84	0.0484	2.303	47.5826
Below Cyano Apr-May 2014	8.25	1.7	0.72	7.7	158.1	0.51	2.1	1.9	0.91	0.039	2.153	55.2051
Cyano Crust Apr-May 2014	7.83	3.6	1.7	5.6	202.9	0.49	3.6	4.8	0.92	0.0753	2.307	30.6375
Lichen Crust Apr-May 2014	7.76	3.8	0.67	4.1	185.1	0.5	3.6	4.5	0.89	0.1698	3.548	20.8952
Moss Crust Apr-May 2014	7.84	6.1	0.68	6.1	165.2	0.73	4.4	5.4	1.2	0.0775	2.338	30.1677
Hilaria Octo-Nov 2013	8.12	1.9	1.5	7.6	117.9	0.45	2.7	3.4	0.95	0.0428	1.864	43.5514
Bromus Oct-Nov 2013	8.13	2.5	1.7	8.2	113.9	0.7	4	5.4	1.7	0.0681	2.196	32.2467
Below Lichen Oct-Nov 2013	8.1	1.5	1.3	5.2	118.3	0.47	5.1	1.8	1.3	0.0307	1.822	59.3485
Below Cyanos Oct-Nov 2013	8.32	2.4	17.9	7.2	163.5	0.26	2.2	1.8	0.66	0.0413	1.914	46.3438
Cyano Crust Oct-Nov 2013	8	2.2	17.6	6.4	159.9	0.41	13.7	4.7	0.82	0.0671	2.244	33.4426
Lichen Crust Oct-Nov 2013	7.74	4.3	13.2	4.6	181.1	0.52	6.6	4.7	1	0.0842	2.546	30.2375
Moss Crust Oct-Nov 2013	7.26	5	3.5	9	133	0.65	27.3	9.3	1.2	0.099	2.504	25.2929
